# Supplementary material
Source: Springer Nature journal article supplement (https://www.springermedizin.de/resource/supplementary/13075_2012_3679_MOESM1_ESM.pdf/9695082)

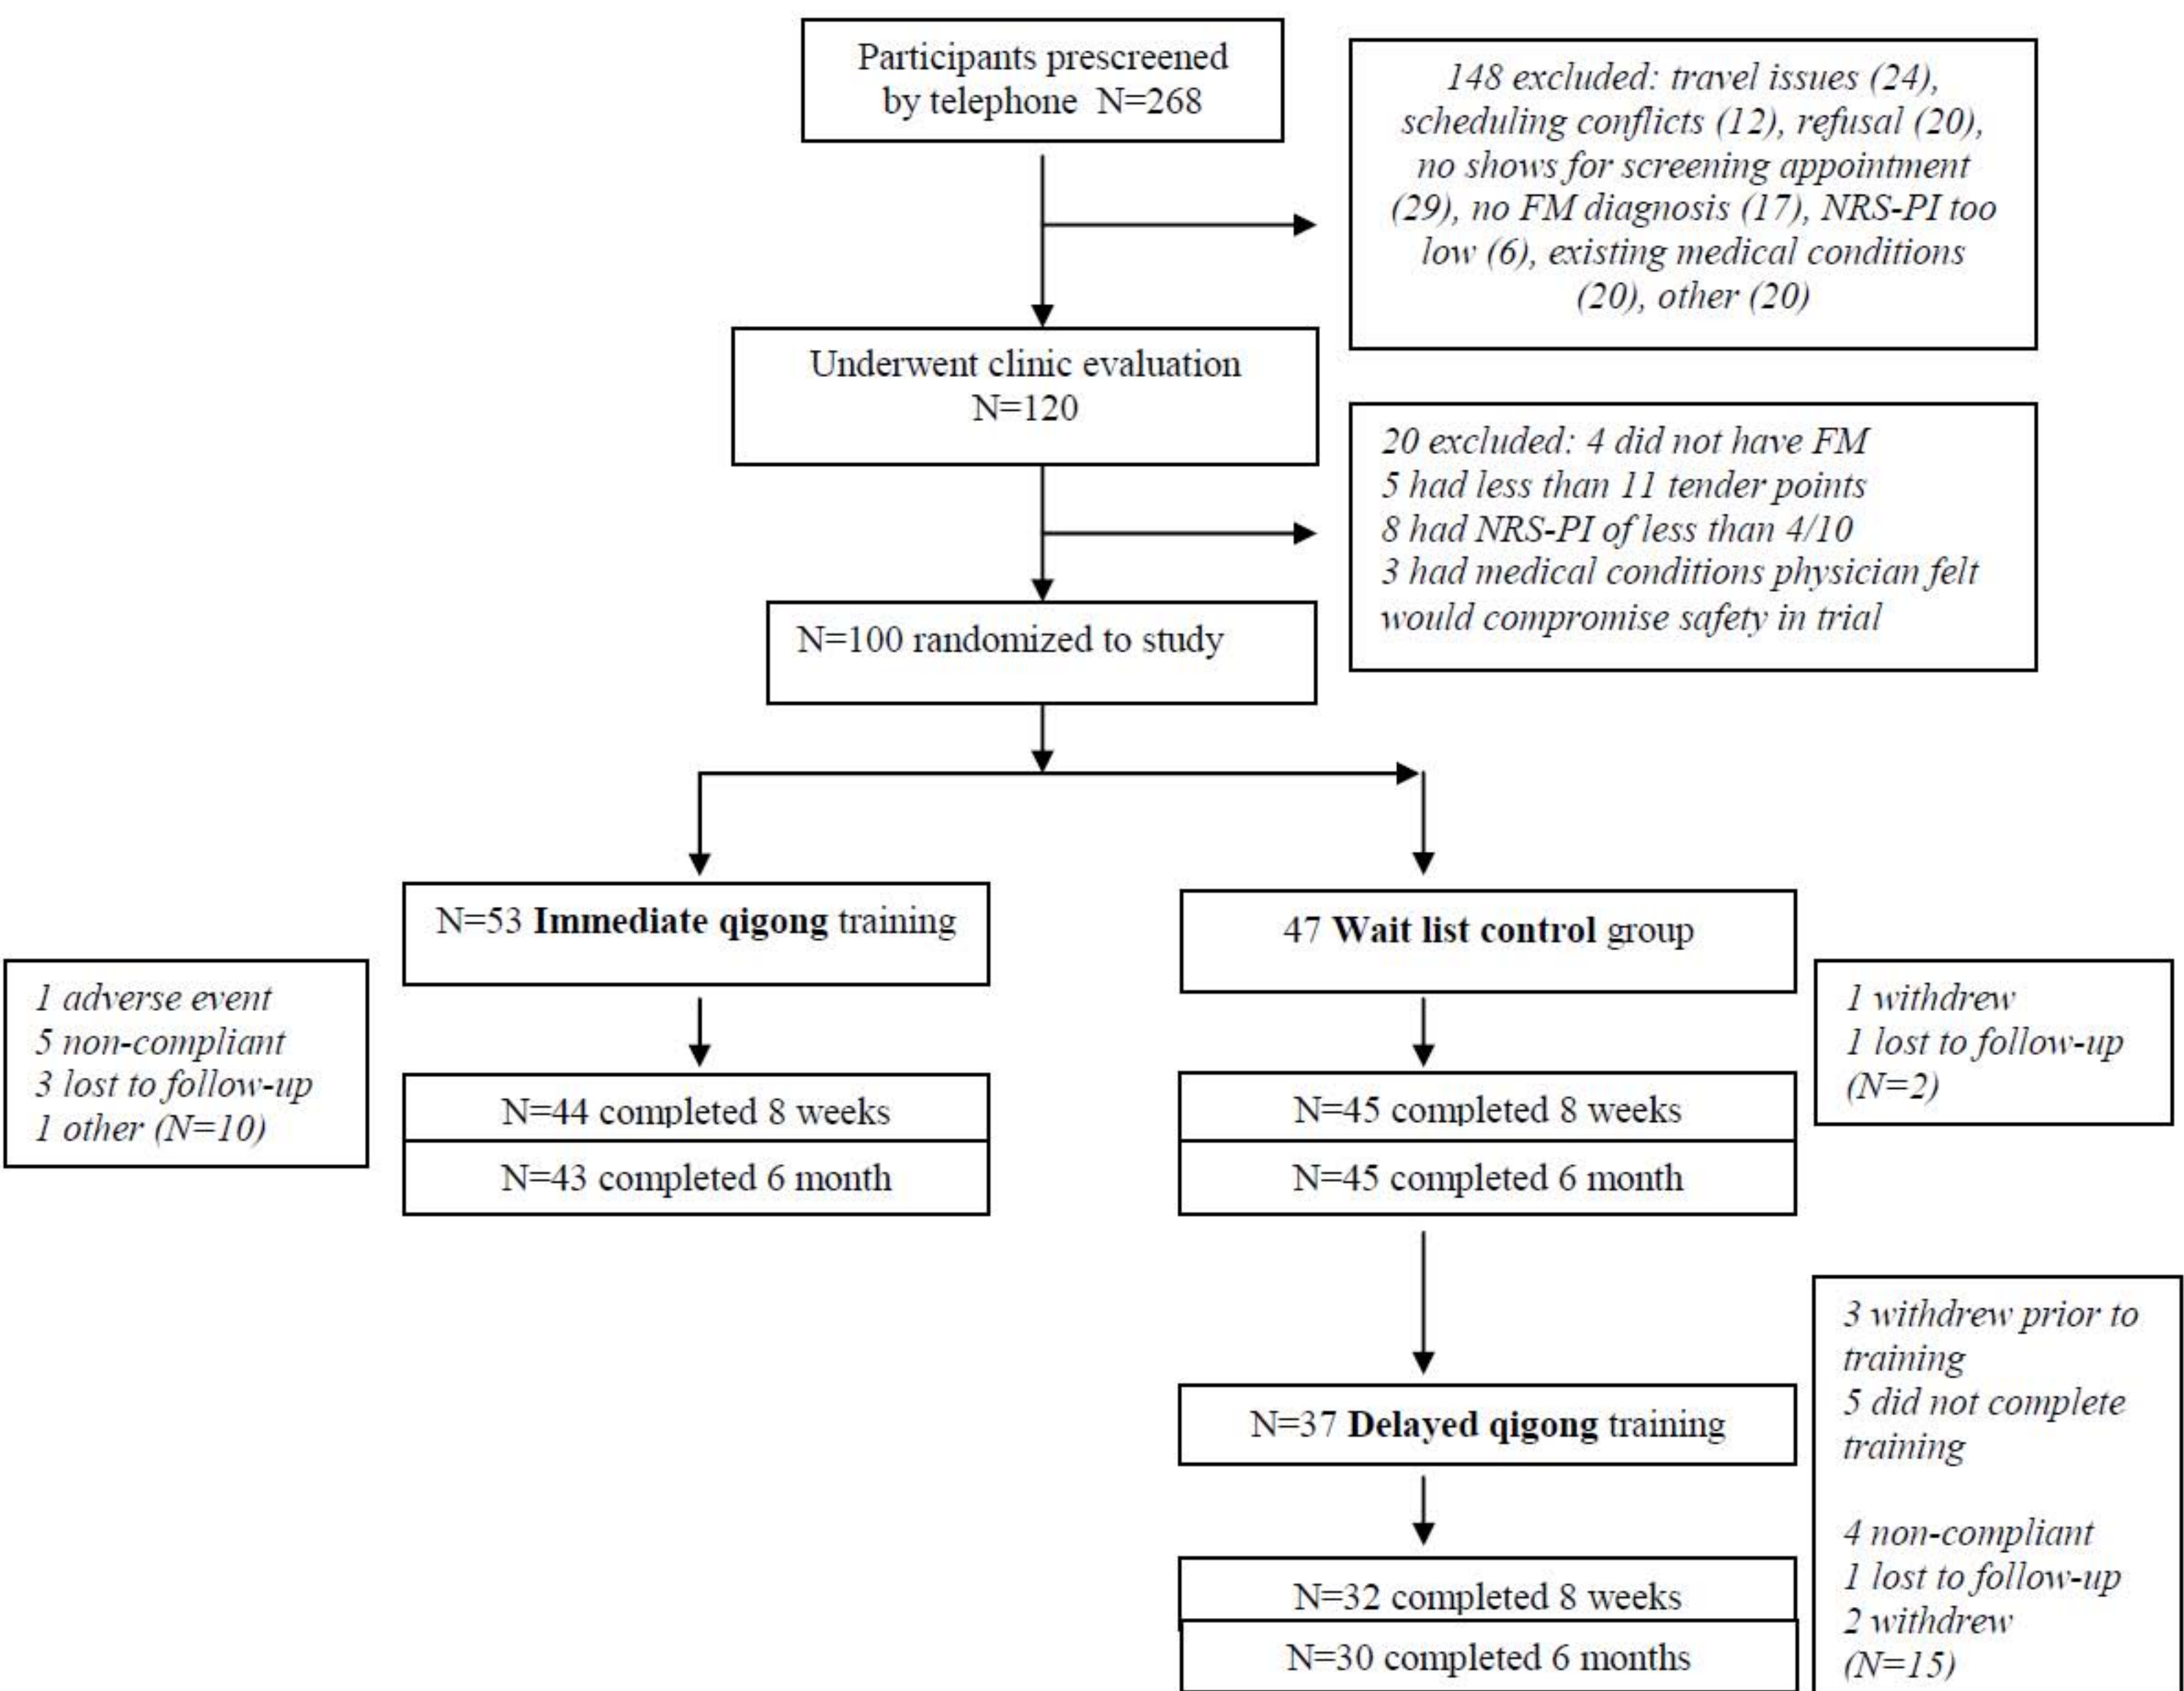

Supplement: MOESM1 [file 9695082]
